# Supplementary material for: Effects of Plasmodium falciparum infection on umbilical artery resistance and intrafetal blood flow distribution: a Doppler ultrasound study from Papua New Guinea
Source: Malar J. 2017 Jan 19;16:35. doi: 10.1186/s12936-017-1689-z (PMC5248505; doi:10.1186/s12936-017-1689-z)
Supplement: Supplementary file 2 — Additional file 2. Malaria infection, nutritional factors, smoking, and other potential associations with elevated umbilical artery resistance index (UARI, >90th centile) during pregnancy in PNG women In contrast to other cohorts, nutritional factors such as MUAC, height and anaemia were not associated with increased UARI. Smoking tobacco, a known risk factor for elevated UARI approached significance (P = 0.085) while other risk behaviours, such as chewing betelnut and drinking alcohol, showed no association. [file 12936_2017_1689_MOESM2_ESM.xlsx]

## Sheet: Additional file 2
Additional file 2: Malaria infection, nutritional factors, smoking and other potential associations with elevated umbilical artery resistance index (UARI, >90th centile) during pregnancy in PNG women.
	% (N)	OR (95% CI)	P	aOR (95% CI)	P
Received intermittent treatment with sulphadoxine-pyrimethamine plus azithromycin
No	47.9 (217/452)
Yes	52.1 (236/452)	1.06 (0.56-2.00)	0.86	1.02 (0.53-1.98)*	0.950*
Mid-upper arm circumference
≥ 22 cm	86.8 (393/452)
< 22 cm	13.3 (60/452)	0.65 (0.22-1.91)	0.429	0.67 (0.22-2.04)*	0.482*
Height
≤150cm	79.3 (359/452)
< 150 cm	20.8 (94/452)	0.59(0.25-1.41)	0.236	0.57 (0.24-1.33)*	0.193*
Haemoglobin
≥ 90 g/L	74.8 (112/444)
< 90 g/L	25.3 (332/444)	1.50 (0.76-2.97)	0.244	1.59 (0.79- 3.20)*	0.192*
High-sensitive C-reactive protein
< 5 mg/L	59.1 (267/452)
≥5 mg/L	40.9 (185/452)	0.67(0.34-1.34)	0.263	0.62 (0.63-2.29)	0.585
Gravidity
1	45. 9(208/452)
>1	54.1 (245/452)	1.08 (0.57-2.05)	0.804	1.07 (0.56-2.02)**	0.840**
Smoking
No	79.9 (362/452)
Yes	20.1 (91/452)	1.85 (0.92-3.72)	0.085	1.85 (0.91-3.78)*	0.091*
Betel nut chewing
No	19.3 (87/451)
Yes	80.7 (364/451)	1.27(0.51-3.16)	0.612	1.26 (0.50-3.15)	0.626
Alcohol
No	92.7 (417/450)
Yes	7.3 (33/450)	1.34 (0.45-3.99)	0.601	1.31 (0.42-4.06)	0.644
Literacy
No	6.0 (27/451)
Yes	94.0 (424/451)	2.79 (0.39-19.74)	0.305	2.73 (0.38-19.38)	0.315
Any malaria infection detected in first 20 wks of pregnancy
No	95.6 (431/451)
Yes	4.4 (20/451)	1.73 (0.48-6.31)	0.41	1.63 (0.46-5.79)	0.454
*adusted for fetal sex, gestational age and gravidity; **adjusted for gestational age
