# Supplementary material for: Effects of Plasmodium falciparum infection on umbilical artery resistance and intrafetal blood flow distribution: a Doppler ultrasound study from Papua New Guinea
Source: Malar J. 2017 Jan 19;16:35. doi: 10.1186/s12936-017-1689-z (PMC5248505; doi:10.1186/s12936-017-1689-z)
Supplement: Supplementary file 4 — Additional file 4. Malaria infection, nutritional factors, smoking, and other potential associations with decreased cerebroplacental Doppler ratio (CPR, <10th centile) during pregnancy in PNG women. Cerebroplacental ratio was not significantly influenced by various nutritional, behavioural and other factors. [file 12936_2017_1689_MOESM4_ESM.xlsx]

## Sheet: Sheet1
Additional file 3: Malaria infection, nutritional factors, smoking and other potential associations with decreased Middle Cerebral Artery Pulsatility Index (MCAPI, <10th centile) during pregnancy in PNG women.
	% (N)	OR (95% CI)	P	aOR (95% CI)	P
Received intermittent treatment with sulphadoxine-pyrimethamine plus azithromycin
No	50.3 (186/370)
Yes	49.7 (184/370)	1.08 (0.57-2.04)	0.81	1.12 (0.58-2.15)	0.741
Mid-upper arm circumference
≥ 22 cm	84.8 (314/370)
< 22 cm	15.1 (56/370)	0.99 (0.39-2.52)	0.982	1.00 (0.39-2.54)	0.985
Height
≥ 150 cm	80.3 (297/370)
< 150 cm	19.7 (73/370)	0.98 (0.43-2.25)	0.97	1.01 (0.44-2.30)	0.981
Haemoglobin
≥ 90 g/L	74.9 (271/362)
< 90 g/L	25.1 (91/362)	1.71 (0.84-3.49)	0.141	1.71 (0.85-3.45)	0.135
High-sensitive C-reactive protein
< 5 mg/L	60.0 (222/370)
≥ 5 mg/L	40.0 (148/370)	1.20 (0.63-2.29)	0.585	1.23 (0.64-2.35)	0.528
Gravidity
1	46.2 (171/370)
>1	53.8 (199/370)	0.98 (0.52-1.85)	0.956	0.97 (0.51-1.82)	0.915
Smoking
No	80.8 (299/370)
Yes	19.2 (71/370)	1.22 (0.55-2.71)	0.627	1.19 (0.54-2.66)	0.669
Betel nut chewing
No	18.7 (69/370)
Yes	81.4 (301/370)	1.34 (0.58-3.08)	0.491	1.38 (0.60-3.14)	0.448
Alcohol
No	93.8 (345/368)
Yes	6.3 (23/368)	1.11 (0.31-4.00)	0.87	1.12 (0.31-3.98)	0.863
Literacy
No	5.4 (20/369)
Yes	94.6 (349/369)	2.71 (0.35-21.03)	0.34	2.68 (0.34-21.06)	0.348
Any malaria infection detected in first 20 wks of pregnancy
No	95.2 (351/369)
Yes	4.8 (18/369)	2.09(0.68- 6.37)	0.196	2.00(0.67-5.98)	0.214
*adusted for fetal sex, gestational age and gravidity; **adjusted for gestational age
