# Supplementary material for: Effects of Plasmodium falciparum infection on umbilical artery resistance and intrafetal blood flow distribution: a Doppler ultrasound study from Papua New Guinea
Source: Malar J. 2017 Jan 19;16:35. doi: 10.1186/s12936-017-1689-z (PMC5248505; doi:10.1186/s12936-017-1689-z)
Supplement: Supplementary file 5 — Additional file 5. Associations of recent malaria infection with Doppler indices. A total of 533 malaria tests preceded the Doppler scan by no more than 6 weeks and were thus considered ‘recent’. In this category, 17 were positive for P. falciparum with either method (13 by qPCR; 11 by LM) and two were positive for P. vivax, by qPCR. Of these, seven infections were sub-microscopic. These data are not shown in the main text as the numbers of recent malaria episodes were too low to confidently perform statistical analyses. [file 12936_2017_1689_MOESM5_ESM.xlsx]

## Sheet: Sheet1
Additional file 4: Malaria infection, nutritional factors, smoking and other potential associations with decreased cerebroplacental doppler ratio (CPR, <10th centile) during pregnancy in PNG women
	% (N)	OR (95% CI)	P	aOR (95% CI)	P
Received intermittent treatment with sulphadoxine-pyrimethamine plus azithromycin
No	49.8 (151/303)
Yes	50.2 (152/303)	1.35 (0.65-2.80)	0.417	1.35 (0.63-2.91)	0.43
Mid-upper arm circumference
≥ 22 cm	84.2 (255/303)
< 22 cm	15.8 (48/303)	1.05 (0.41-2.71)	0.904	1.00 (0.38-2.63)	0.989
Height
≥ 150 cm	79.9 (242/303)
< 150 cm	20.1 (61/303)	0.93 (0.36-2.42)	0.888	0.86 (0.33-2.23)	0.761
Haemoglobin
≥ 90 g/L	74.2 (221/298)
< 90 g/L	25.8 (77/298)	1.37 (0.61-3.08)	0.439	1.41 (0.63-3.15)	0.4
High-sensitive C-reactive protein
< 5 mg/L	58.8 (178/303)
≥ 5 mg/L	41.2 (125/303)	1.03 (0.49-2.15)	0.935	1.01 (0.48-2.09)	0.988
Gravidity
1	54.1 (164/303)
>1	45.9 (139/303)	1.85 (0.87-3.81)	0.11	1.85 (0.86-3.96)	0.12
Smoking
No	79.9 (242/303)
Yes	20.1 (61/303)	0.71 (0.26-1.96)	0.508	0.75 (0.27-2.10)	0.586
Betel nut chewing
No	19.5 (59/303)
Yes	80.5 (244/303)	0.74 (0.31-1.75)	0.494	0.75 (0.32-1.76)	0.512
Alcohol
No	94.0 (283/301)
Yes	6.0 (18/301)	0.83 (0.19-3.67)	0.808	0.81 (0.19-3.44)	0.778
Literacy
No	6.0 (18/302)
Yes	94.0 (284/302)	1.03(0.22-4.78)	0.969	0.85 (0.19-3.92)	0.84
Any malaria infection detected in first 20 wks of pregnancy
No	95.1 (287/302)
Yes	4.9 (15/302)	1.79 (0.50-0.42)	0.373	1.64(0.43-6.28)	0.46
*adusted for fetal sex, gestational age and gravidity; **adjusted for gestational age
